# Supplementary material for: Molecular Modification of Kex2 P1’ Site Enhances Expression and Druggability of Fungal Defensin
Source: MDPI journal article supplement (doi:10.3390/antibiotics12040786), 2023-04-20
Supplement: s1 [file s1]

## Supplementary materials

### Molecular Modification of Kex2 P1' Site Enhances Expression and Druggability of Fungal Defensin

Yanjie Jin<sup>1,2,3,†</sup>, Na Yang<sup>1,2,3,†</sup>, Da Teng<sup>1,2,3</sup>, Ya Hao<sup>1,2,3</sup>, Ruoyu Mao<sup>1,2,3,\*</sup>  
and Jianhua Wang<sup>1,2,3,\*</sup>

1 Gene Engineering Laboratory, Feed Research Institute, Chinese Academy of Agricultural Sciences, Beijing 100081, China

2 Innovative Team of Antimicrobial Peptides and Alternatives to Antibiotics, Feed Research Institute, Chinese Academy of Agricultural Sciences, Beijing 100081, China

3 Key Laboratory of Feed Biotechnology, Ministry of Agriculture and Rural Affairs, Beijing 100081, China

\* Correspondence: maoruoyu@caas.cn (R.M.); wangjianhua@caas.cn (J.W.)

† These authors contributed equally to this work.

**Table S1.** The amino acid sequences of 20 new constructs.

| New constructs<br>(XNZ) | Amino acid sequence                                 |
|-------------------------|-----------------------------------------------------|
| NZ2114                  | N'- GFGCNGPWNEDDLRCNHCKSIKGYKGGYCAKGGFVCKCY<br>(40) |
| ANZ                     | A-----CY                                            |
| CNZ                     | C-----CY                                            |
| DNZ                     | D-----CY                                            |
| ENZ                     | E-----CY                                            |
| FNZ                     | F-----CY                                            |
| GNZ                     | G-----CY                                            |
| HNZ                     | H-----CY                                            |
| INZ                     | I-----CY                                            |
| KNZ                     | K-----CY                                            |
| LNZ                     | L-----CY                                            |
| MNZ                     | M-----CY                                            |
| NNZ                     | N-----CY                                            |
| PNZ                     | P-----CY                                            |
| QNZ                     | Q-----CY                                            |
| RNZ                     | R-----CY                                            |
| SNZ                     | S-----CY                                            |
| TNZ                     | T-----CY                                            |
| VNZ                     | V-----CY                                            |
| WNZ                     | W-----CY                                            |
| YNZ                     | Y-----CY                                            |

NT: The dotted line indicates the same amino acid sequence as NZ2114 except 1<sup>st</sup> residue.

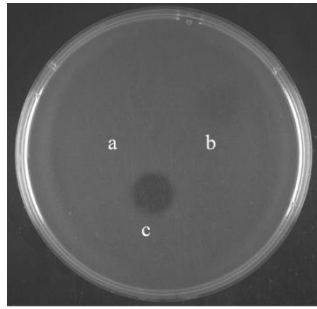

**Figure S1.** The antibacterial activity of FNZ purified collected peak was identified by inhibition zone assay. a: penetration peak; b: 27.5% B eluting peak; c: 60% B eluting peak, 20  $\mu$ L of every collected peak. The tested strain was *S. aureus* ATCC 43300.
